# Supplementary material for: Whey Protein Peptides Have Dual Functions: Bioactivity and Emulsifiers in Oil-In-Water Nanoemulsion
Source: MDPI journal article supplement (doi:10.3390/foods11121812), 2022-06-20
Supplement: s1 [file s1]

**Figure S1**

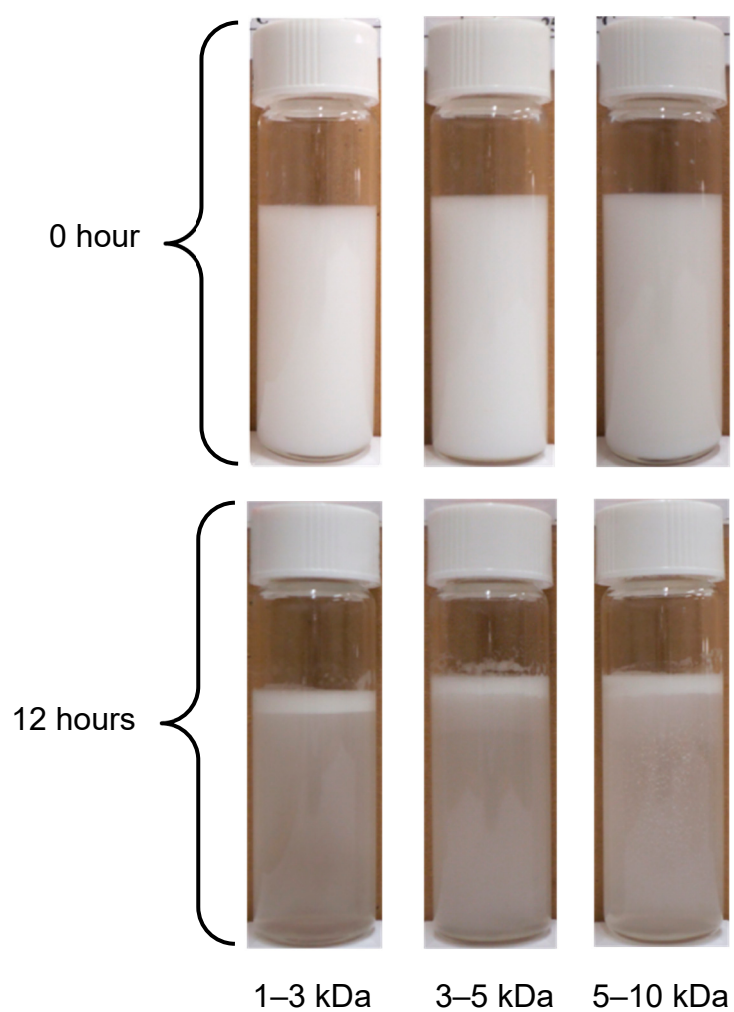

**Figure S1:** Appearance at time 0 and 12 hours of the 1–3, 3–5, and 5–10 kDa WPI fraction (nano)emulsions. Emulsions were prepared with 2% peptide emulsifier and stored at 25 °C.
