# Supplementary material for: Whey Protein Peptides Have Dual Functions: Bioactivity and Emulsifiers in Oil-In-Water Nanoemulsion
Source: MDPI journal article supplement (doi:10.3390/foods11121812), 2022-06-20
Supplement: s1 [file s1]

**Figure S3**

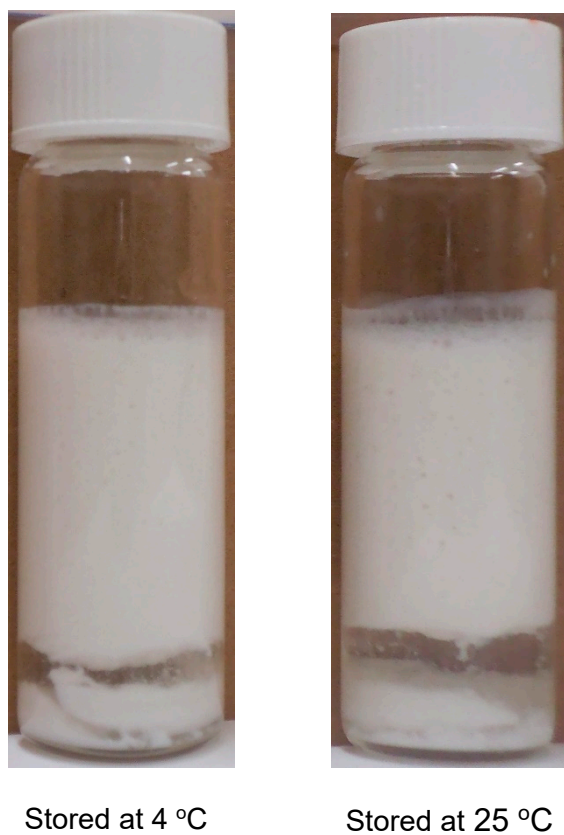

**Figure S3:** After 24 hours, the 4% UP–10F pepsin WPI fraction emulsion showed a solid gel-like matrix with cracks and subsequent drainage of the aqueous phase.
