# Supplementary material for: Whey Protein Peptides Have Dual Functions: Bioactivity and Emulsifiers in Oil-In-Water Nanoemulsion
Source: MDPI journal article supplement (doi:10.3390/foods11121812), 2022-06-20
Supplement: s1 [file s1]

**Figure S2**

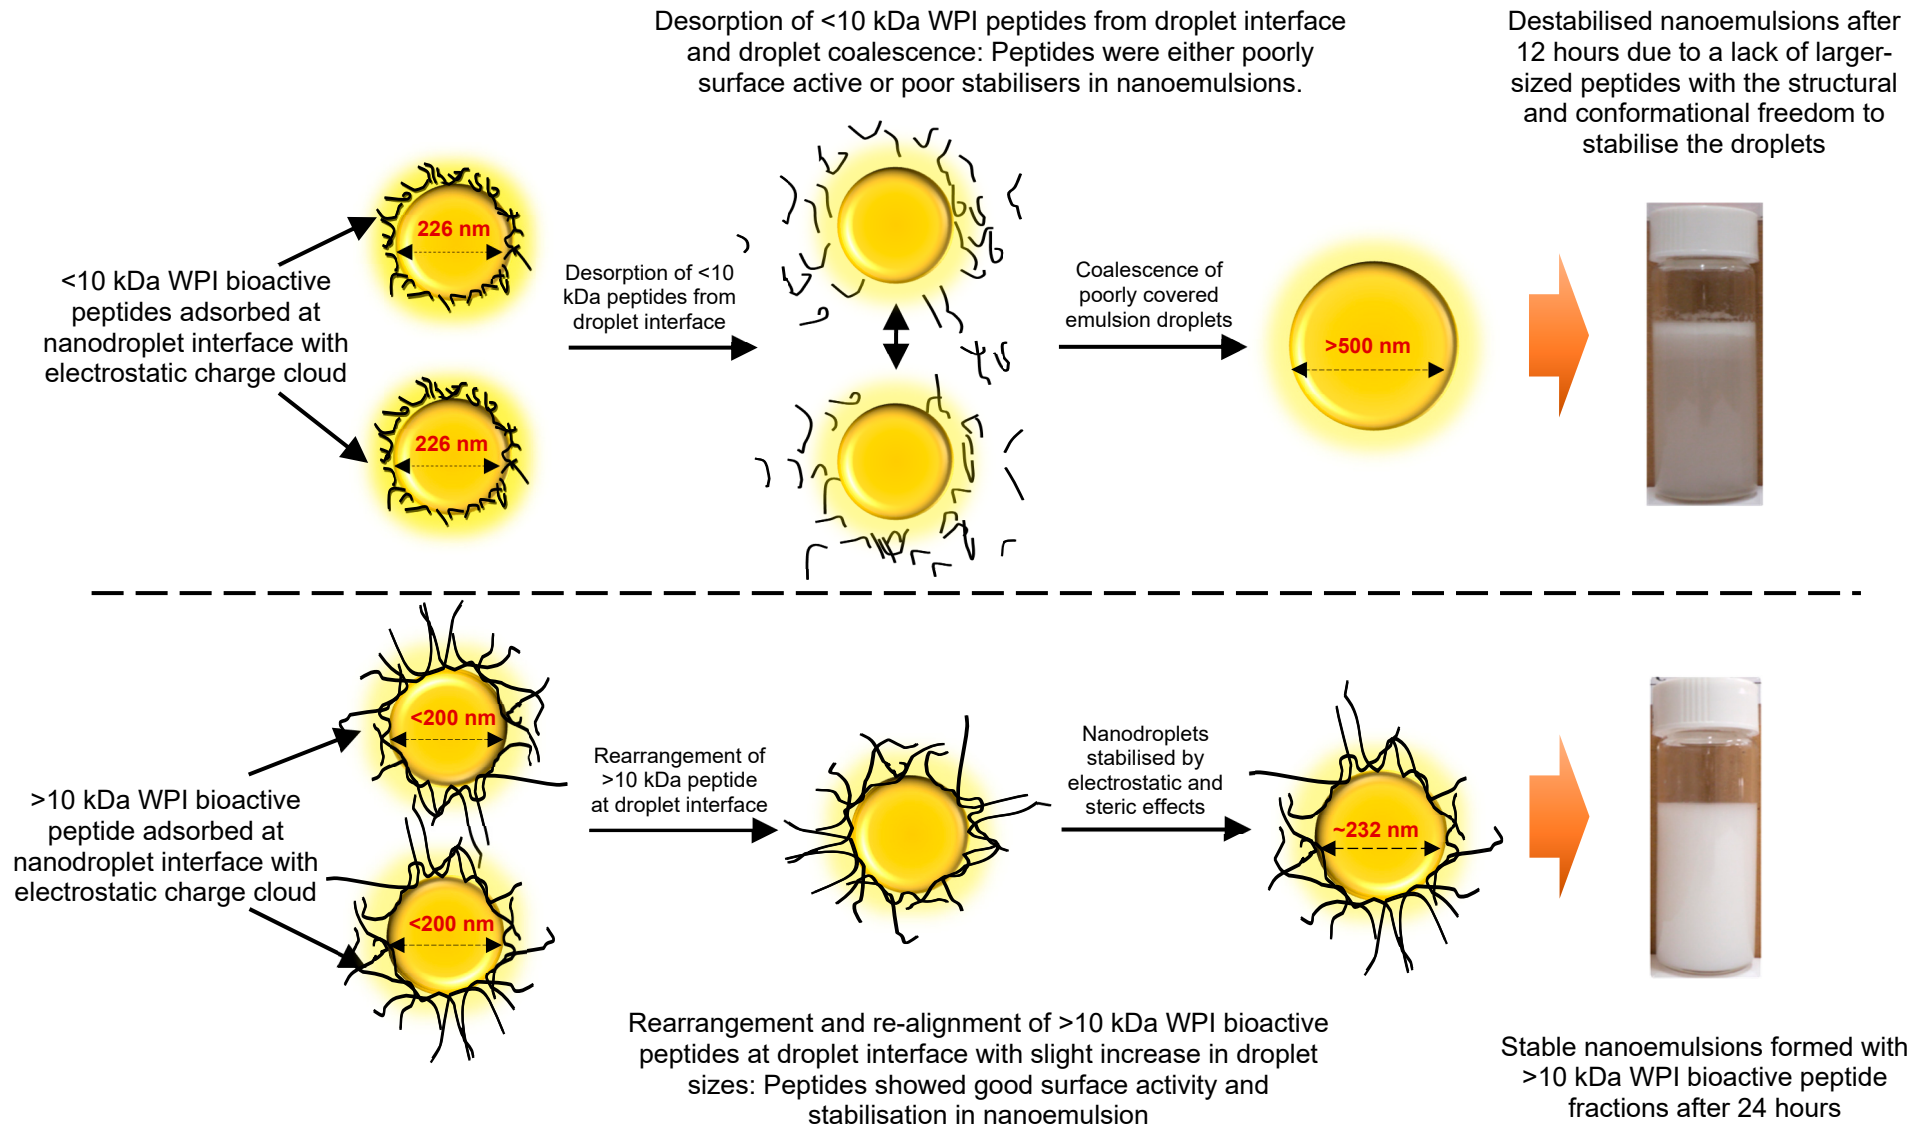

**Figure S2:** Illustration of the stabilization and destabilization of nanoemulsions produced by different WPI bioactive peptide fractions. WPI bioactive peptide fractions were obtained by chymotrypsin hydrolysis.
